# Supplementary material for: Development and Validation of Automated Magnetic Resonance Parkinsonism Index 2.0 to Distinguish Progressive Supranuclear Palsy‐Parkinsonism From Parkinson's Disease
Source: PubMed Central journal article supplement (PMC9321546; doi:10.1002/mds.28992), 2022-04-11
Supplement: MDS-37-1272-s009.pdf [file MDS-37-1272-s009.pdf]

### T1- Weighted MRI

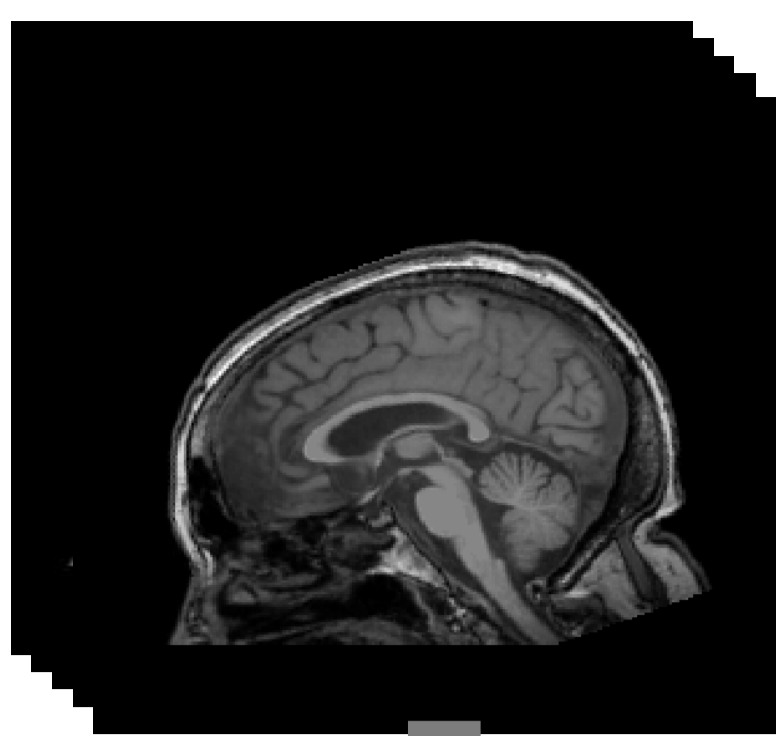

### Automatic segmentation of the corpus callosum and Individuation of mid-sagittal plane

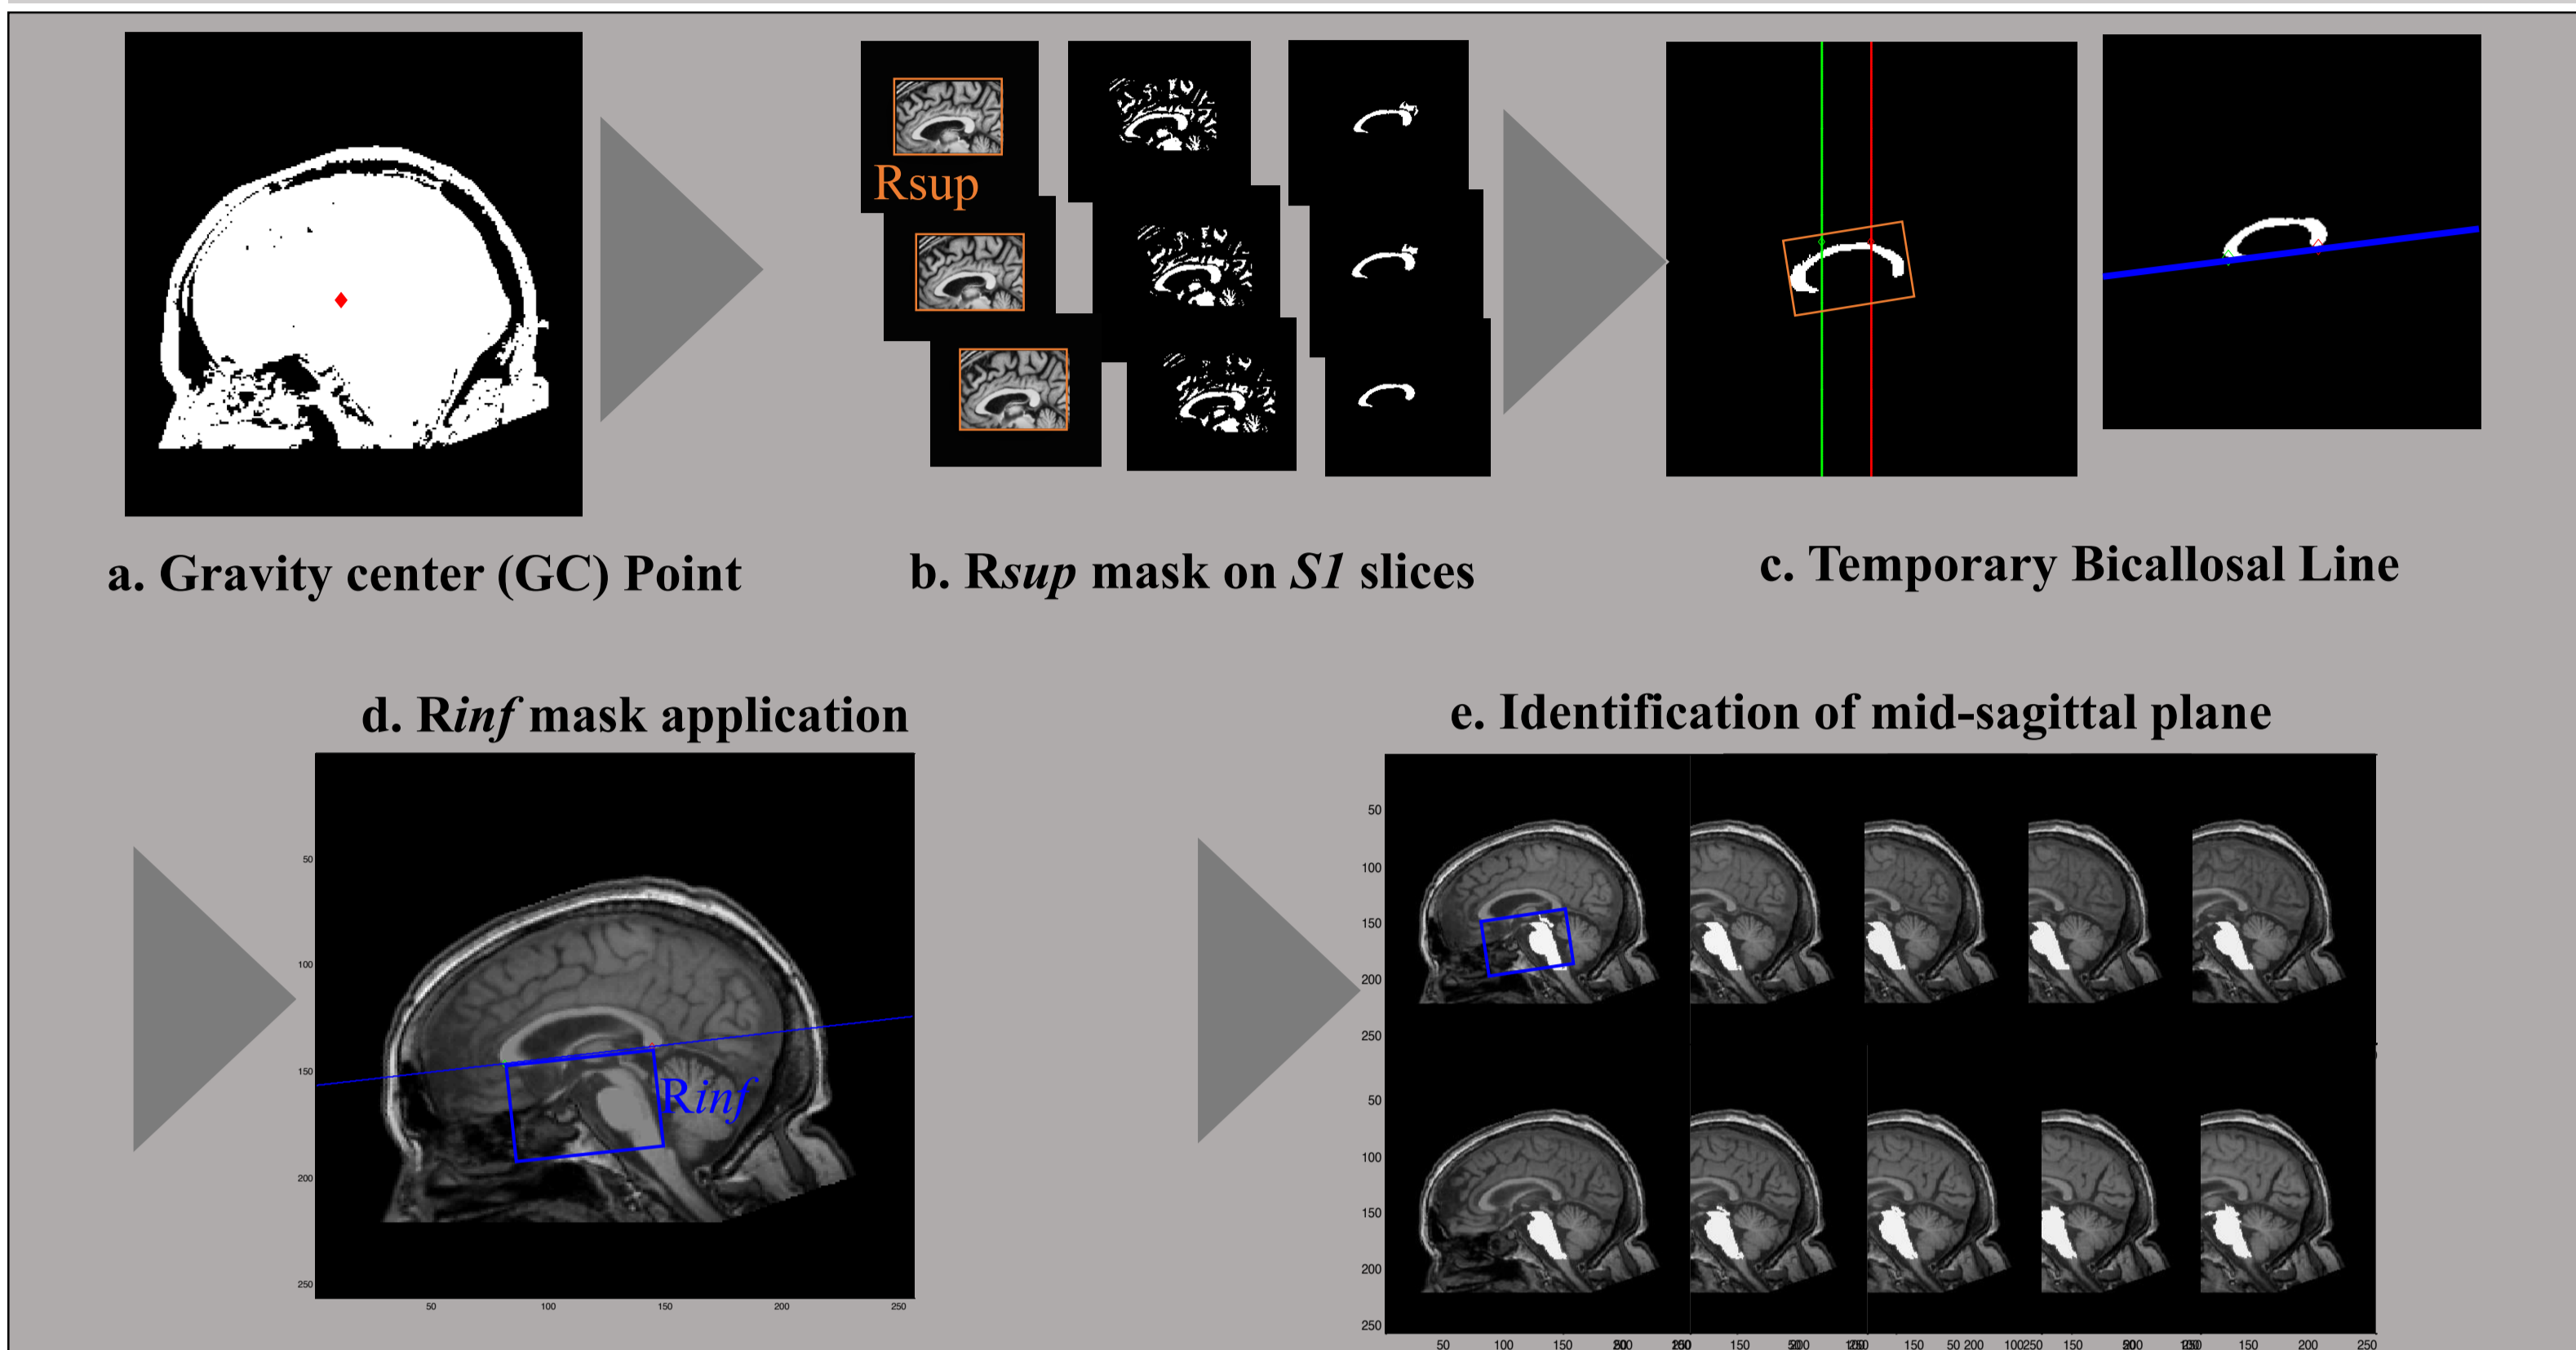

### Automatic Segmentation of the 3<sup>o</sup> Ventricle

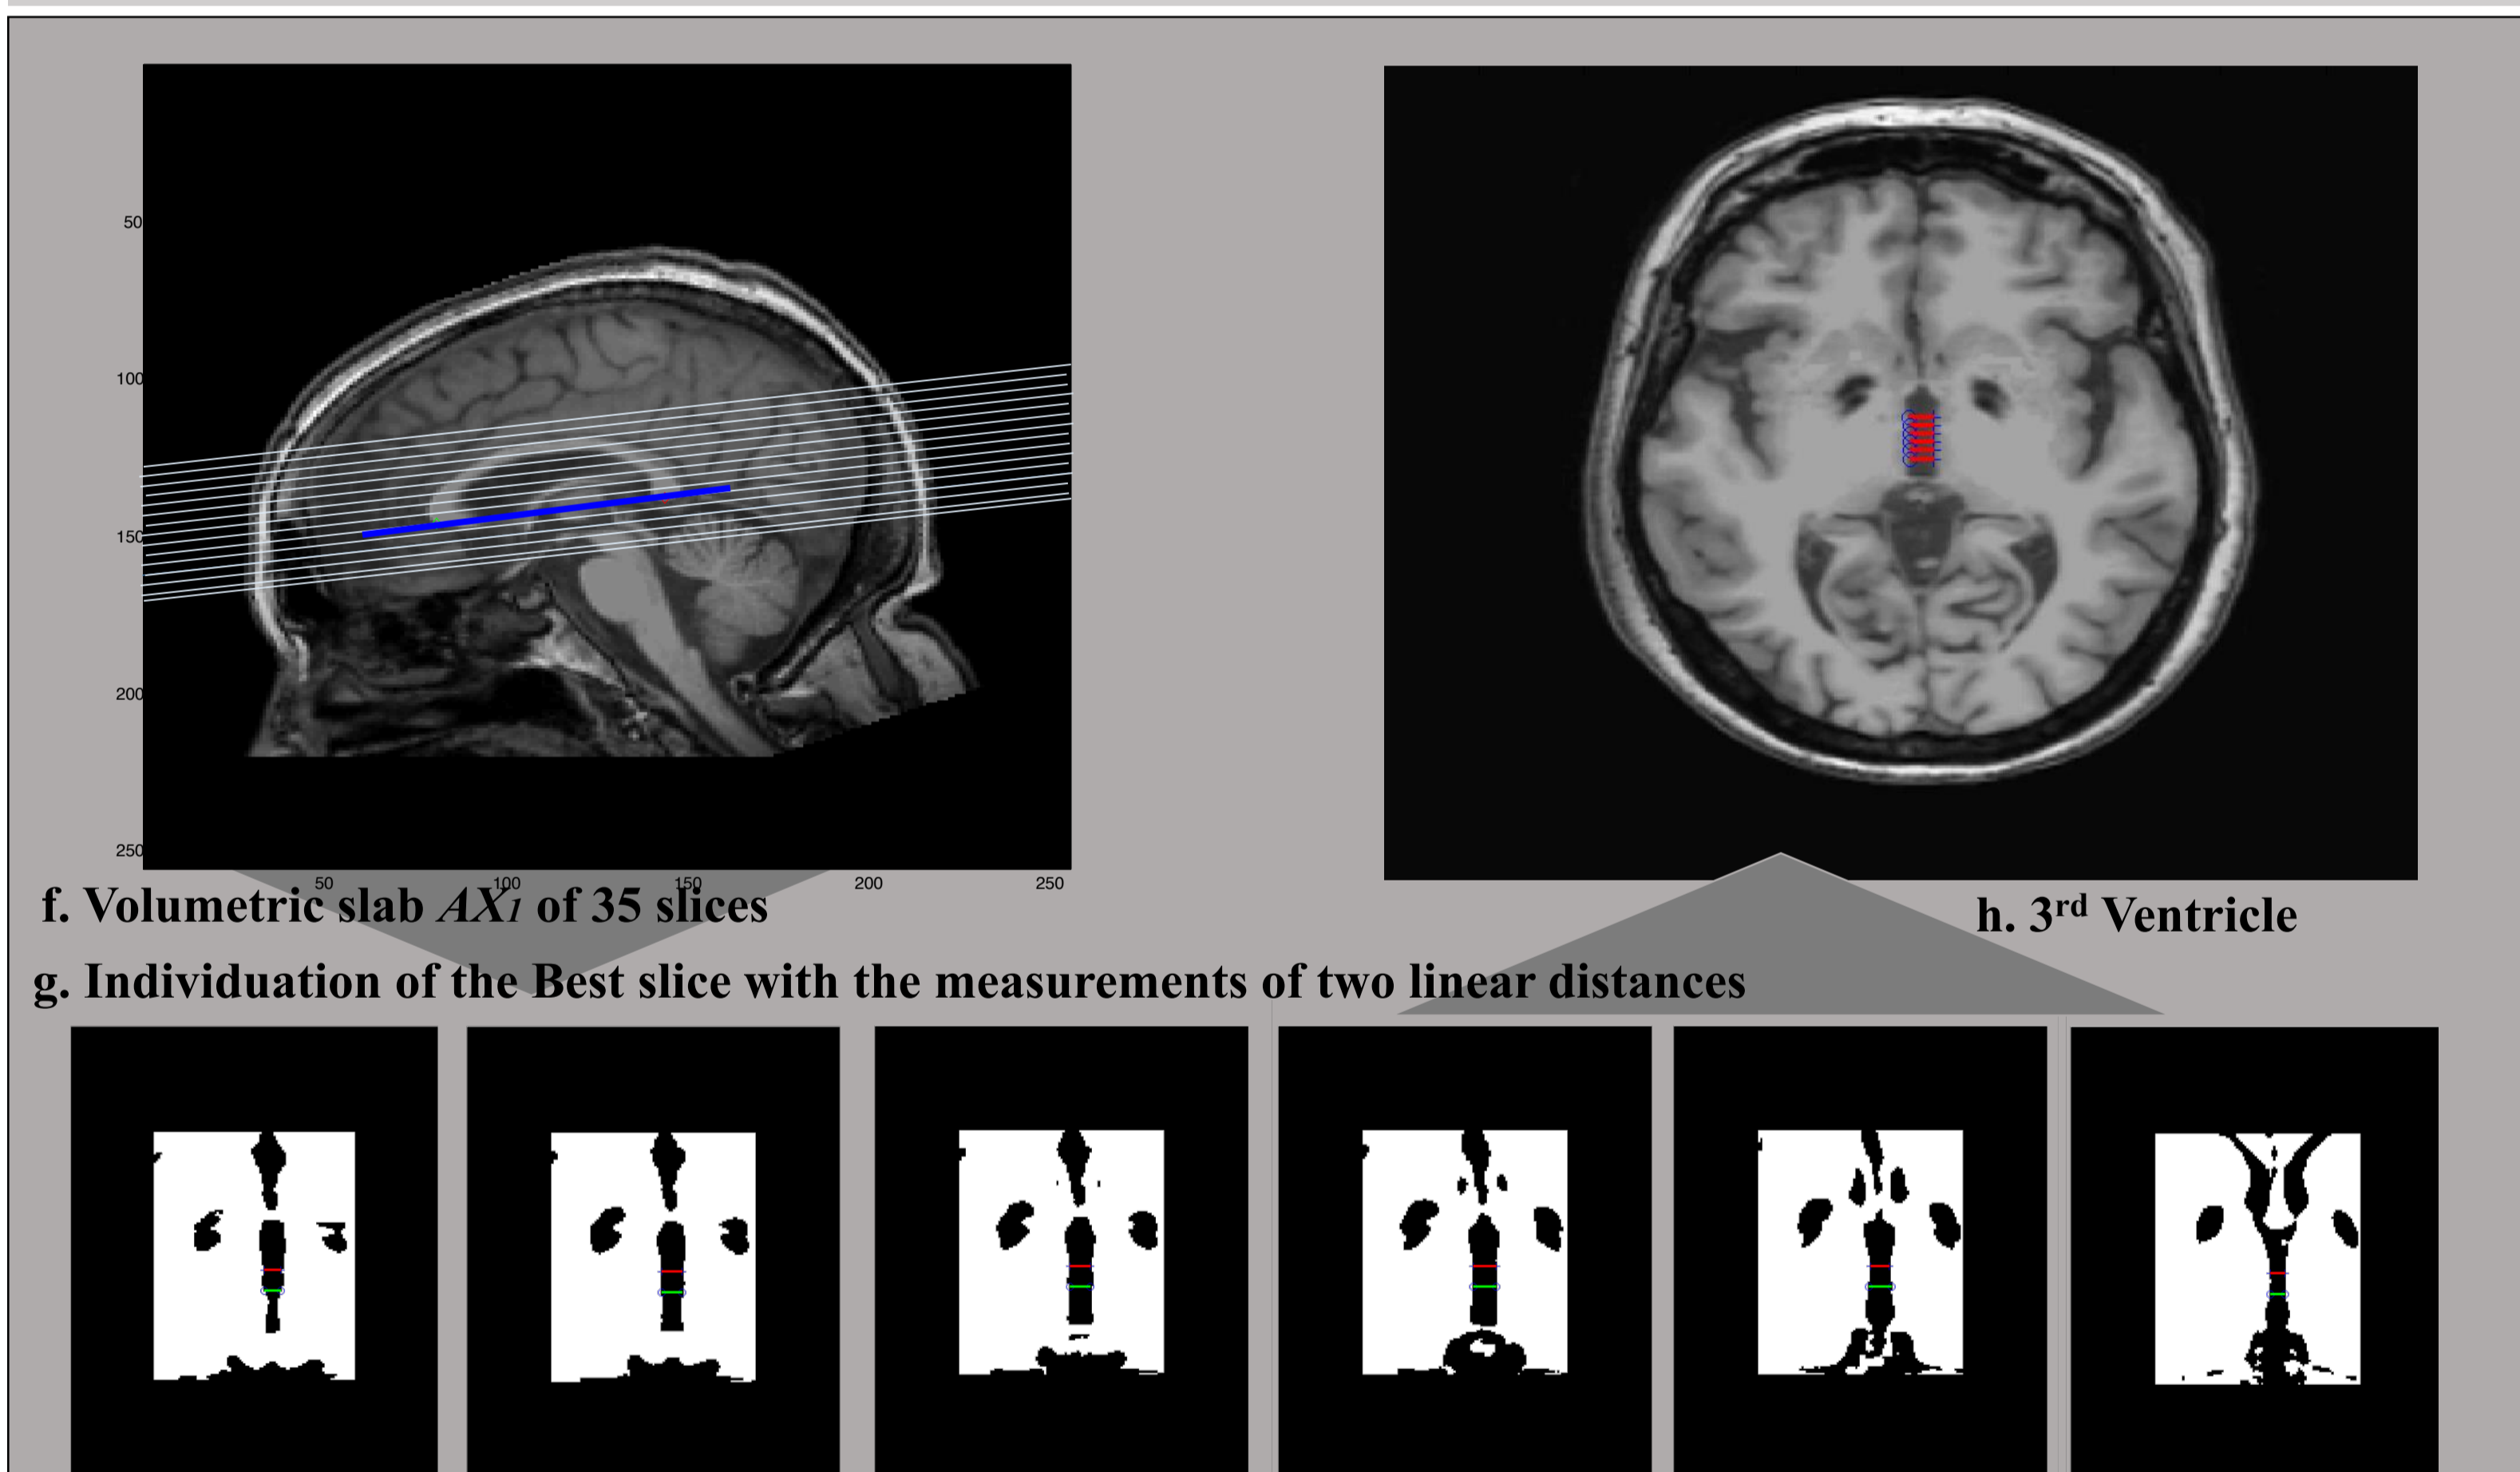

### Automatic Segmentation of the Frontal Horns

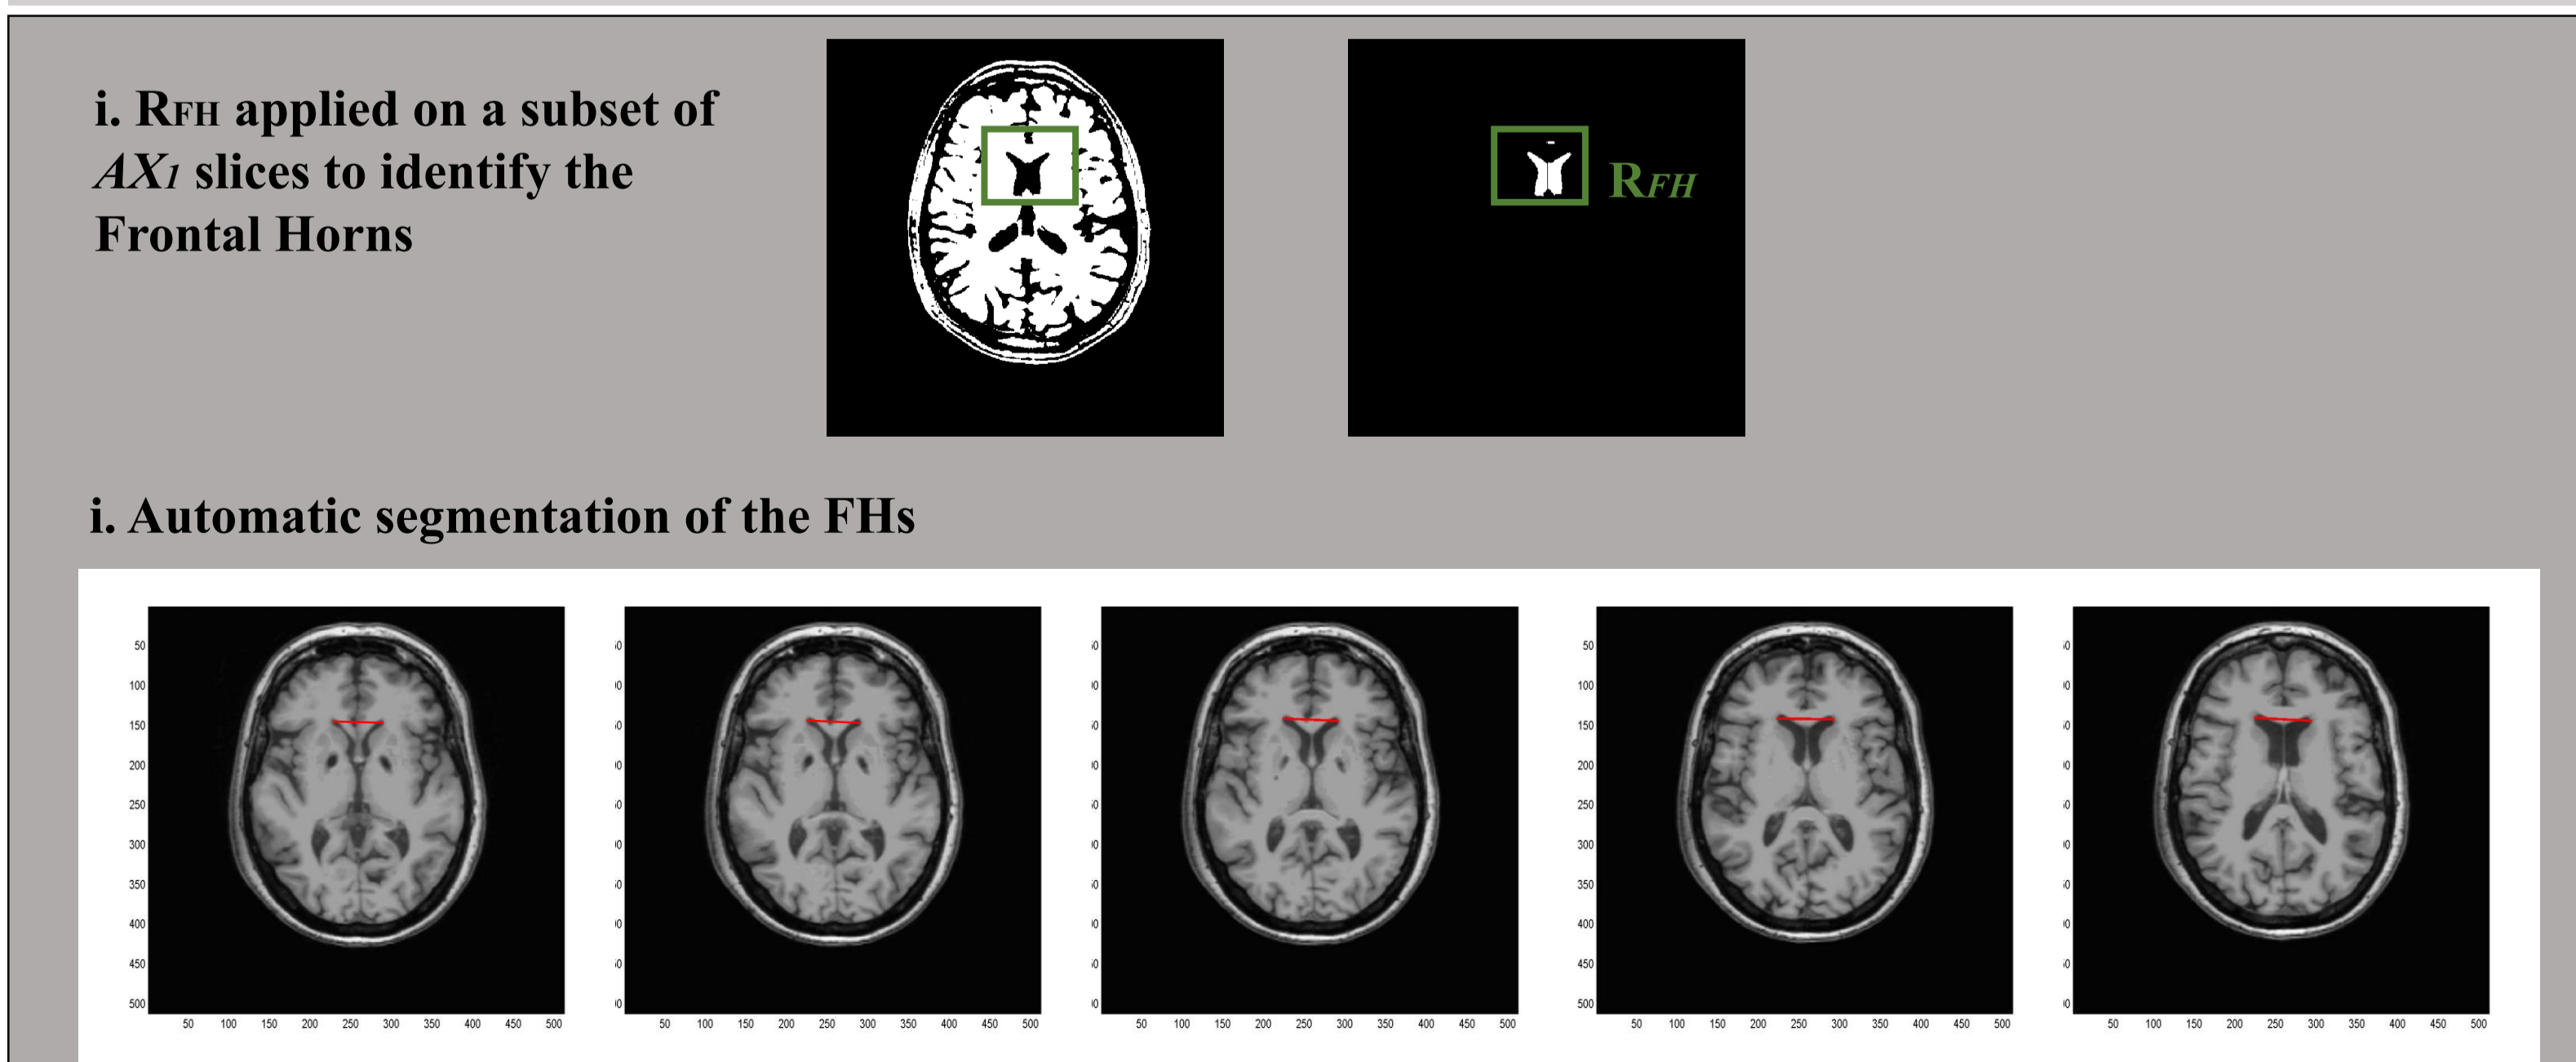

$$\text{AUTOMATIC MRPI 2.0} = \text{MRPI} \cdot 3^{\circ}\text{V} / \text{FH}$$
